# Supplementary material for: Sacrificial Fe sites making 2D heterostructure an efficient catalyst for oxygen evolution reaction in alkaline seawater
Source: Royal Society of Chemistry journal article supplement (doi:10.1039/d4ta07179d), 2024-01-01
Supplement: d4ta07179d1.pdf [file d4ta07179d1.pdf]

## **Role of sacrificial Fe sites in making a 2D heterostructure as an efficient catalyst for oxygen evolution reaction in seawater**

Suraj Loomba<sup>a</sup>, Muhammad Waqas Khan<sup>b</sup>, Ashakiran Maibam<sup>c</sup>, Muhammad Haris<sup>a</sup>, Sharafadeen Gbadamasi<sup>a</sup>, Vasundhara Nettem<sup>b</sup>, Seyedmahdi Mousavi<sup>a</sup>, Anton Tadich<sup>d</sup>, Lars Thomsen<sup>d</sup>, Karishma Jain<sup>b,e</sup>, Babar Shabbir<sup>b</sup>, Asif Mahmood<sup>f</sup>, Ravichandar Babarao<sup>g,h,i,\*</sup>, Jian Xian<sup>j</sup>, and Nasir Mahmood<sup>b,\*</sup>

<sup>a</sup>*School of Engineering, RMIT University, Victoria, 3000, Australia*

<sup>b</sup>*School of Science, RMIT University, Victoria 3001, Australia*

Email: nasir.mahmood@rmit.edu.au

<sup>c</sup>*ICGM, University of Montpellier, CNRS, ENSCM, Montpellier, France*

<sup>d</sup>*Australian Synchrotron, ANSTO, 800 Blackburn Road, Clayton, Victoria, 3168, Australia*

<sup>e</sup>*Advanced Carbon Products and Metrology Department, CSIR- National Physical Laboratory (CSIR-NPL), New Delhi 110012, India*

<sup>f</sup>*School of Mathematical and Physical Science, University of Technology Sydney, Sydney, New South Wales, 2007, Australia*

<sup>g</sup>*School of Science, Centre for Advanced Materials and Industrial Chemistry (CAMIC), RMIT University, Melbourne 3001, Victoria, Australia*

<sup>h</sup>*CSIRO, Normanby Road, Clayton 3168, Victoria, Australia*

<sup>i</sup>*ARC Centre of Excellence for Green Electrochemical Transformation of Carbon Dioxide, School of Science, RMIT University, Melbourne 3000, Australia*

<sup>j</sup>*School of Materials and Energy, University of Electronic Science and Technology of China, Chengdu, 611731, China*

## **Experimental Methods**

### **Material Characterization**

To analyze the morphology, crystal structure, and lattice imperfections, transmission electron microscope (TEM), high-resolution TEM analysis, and energy-dispersive X-ray spectroscopy (EDS) were done by using JEOL 2100F instrument. X-ray diffraction (XRD) analysis was done using a Bruker D4 Endeavor to obtain the crystal structure of the products. High-resolution X-ray photoelectron spectroscopy (XPS) was conducted by using a thermo-scientific K-alpha system. The system consists of an Al K $\alpha$  monochromated X-ray source for scanning the samples at a dwell time of 50 ms<sup>-1</sup> and pass time of 50 eV. Raman spectra were obtained using

a LabRAM HR evolution Raman spectrometer (Horiba Scientific) under a 532 nm laser with 50 mW power. Perkin Elmer Spectrum 100 Fourier-transform infrared (FTIR) spectroscopy was used to study the spectra ranging between 200 and 4000  $\text{cm}^{-1}$ . A CHI 760D electrochemical workstation (CH Instruments) was used for the electrochemical measurements. Near edge X-ray absorption fine structure (NEXAFS) data was acquired using the High Throughput NEXAFS endstation at the soft X-ray beamline, Australian Synchrotron in Partial Electron Yield (PEY) mode using a retarding grid-based channeltron detector set to an appropriate bias for each element. The gas chromatography was done using Varian gas chromatograph with single quadrupole mass spectrometer (GC-MS). The gas chromatography was performed using a Varian gas chromatograph with a single quadrupole mass spectrometer (GC-MS). The Agilent inductively coupled plasma mass spectrometer (ICP-MS) with laser ablation 2 capability was used to acquire the ICP-MS results.

### **Electrochemical measurements**

The electrochemical testing of the as-prepared samples was done in 1.0 M KOH, and seawater electrolytes at ambient temperature and pressure using a CHI 760 D electrochemical workstation (CH Instruments) in which saturated Hg/HgO was used as the reference electrode, a graphite rod as the counter electrode, and the working electrode was prepared by drop-casting the samples on nickel foam which was washed with dilute HCl and water before electrode preparation. The polarization curves were recorded with a scan rate of 5  $\text{mV s}^{-1}$  after iR correction. The powdered sample was added to the carbon black solution (4:1), followed by the addition of Polytetrafluoroethylene (PTFE) solution (60% in  $\text{H}_2\text{O}$ , sigma) and sonicated to form a homogeneous ink. The carbon black solution was prepared by adding 20 mg carbon to a 20 mL mixture of Isopropyl alcohol (IPA) and water (1:4). The solution was then sonicated for 1h to acquire proper dispersion. Then, 200  $\mu\text{L}$  of the ink was drop-casted onto an area of 0.25  $\text{cm}^2$  on nickel foam. For determining the electrochemical double-layer capacitance ( $C_{\text{dl}}$ ), electrochemical cyclic voltammetry (CV) measurements were performed over a range of scan rates (10, 20, 30, 40, and 50  $\text{mV s}^{-1}$ ). Electrochemical impedance spectroscopy (EIS) was carried out over the frequency range of 1 to 10,000 Hz using an AC voltage of 5 mV amplitude. The stability tests were also performed at a fixed potential.

### **Diethyl-p-phenylene diamine (DPD) test**

The DPD test measures chlorine in various forms, such as free, combined, or total chlorine residuals. 10 mL of natural seawater and electrolyte (post-testing) was taken in a glass vial, and

the pH of the solvents was adjusted between 7-8 by using acetic acid followed by the addition of 2  $\mu$ L DPD.

### Density functional theory calculations

Computational calculations on model FeO(111), MoO<sub>2</sub>(-111), and MO@FO surfaces were performed using density functional theory (DFT) as implemented in the Vienna *ab initio* simulation package (VASP).<sup>[11,12]</sup> A generalized gradient approximation (GGA) method was employed with the Perdew-Burke-Ernzerhof (PBE) exchange correlation to define the ion-electron interaction of the electrons defined using the projector augmented wave (PAW) method.<sup>[13]</sup> An energy cutoff of 400 eV was applied, with a *k*-point mesh of 2 x 2 x 1 for the geometry optimization with the van der Waals forces were accounted by the Grimme DFT-D3 method with Becke-Johnson damping function.<sup>[14]</sup> For the geometry optimization calculations, the atomic positions were relaxed until the total energy was converged to 1 x 10<sup>-5</sup> eV and the Hellman-Feynman force on each relaxed atom was less than -0.05 eV/Å. A vacuum spacer of 20 Å was inserted along the *z*-direction to avoid interlayer interactions. The adsorption energy ( $E_{ad}$ ) of the reactant gas species or OER intermediates on the oxide surfaces was calculated as follows:

$$E_{ad} = (E_{total} - (E_{oxides} + E_{gas-species})) \quad (1)$$

where  $E_{total}$  is the total energy of the intermediate geometry;  $E_{oxides}$  is the total energy of the oxide surface and  $E_{gas-species}$  is the electronic energy of the gas species or OER intermediates. The OER mechanism on FeO, MoO<sub>2</sub> surfaces, and MO@FO heterostructure have been investigated to evaluate the oxygen evolution efficiency and investigate the active center of OER on the surfaces. The change in Gibbs free energy,  $\Delta G$  of the reaction mechanism along the reaction coordinates has been computed to explore the reaction mechanism, and  $\Delta G$  has been calculated as,

$$\Delta G = \Delta E - \Delta ZPE - T\Delta S \quad (2)$$

where  $\Delta E$  is the change in electronic energy,  $\Delta ZPE$  is the change in zero-point energy, and  $\Delta S$  is the entropy correction at room temperature (298.15 K) obtained from non-imaginary frequencies of the OER intermediates. The potential rate-determining step (PDS) for the OER reaction is the single step with the highest free energy change ( $\Delta G_{max}$ ), and the limiting potential,  $U_{OER}$  is equal to  $-(\Delta G_{max})/e$ . The corresponding theoretical OER overpotential,  $\eta_{OER} = U_{SHE} - U_{OER}$ , where  $U_{SHE} = 1.23$  V for the standard H<sub>2</sub>O/O<sub>2</sub> reduction reaction.

## Supporting Results and Data

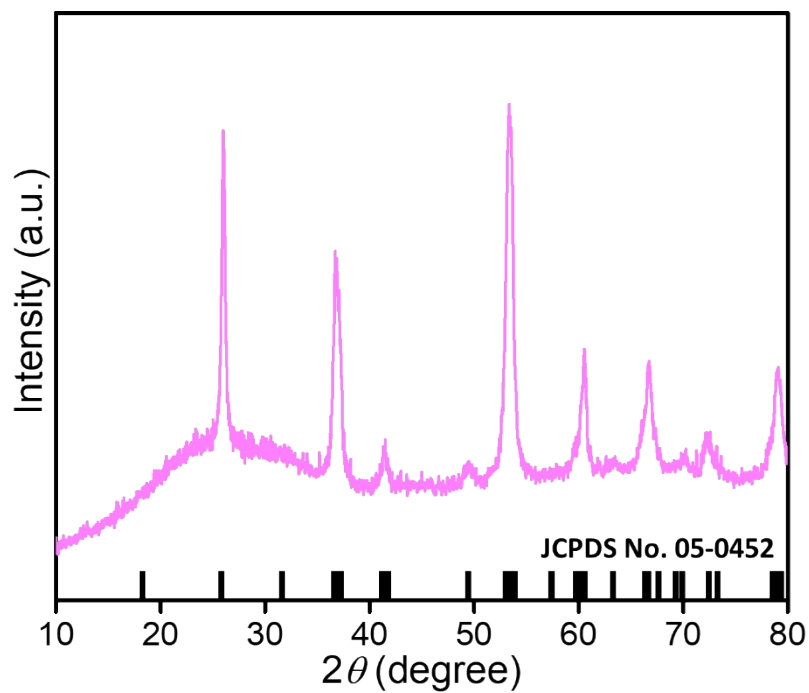

Figure S1. XRD of MoO<sub>2</sub> matching with JCPDS No. 05-0452.

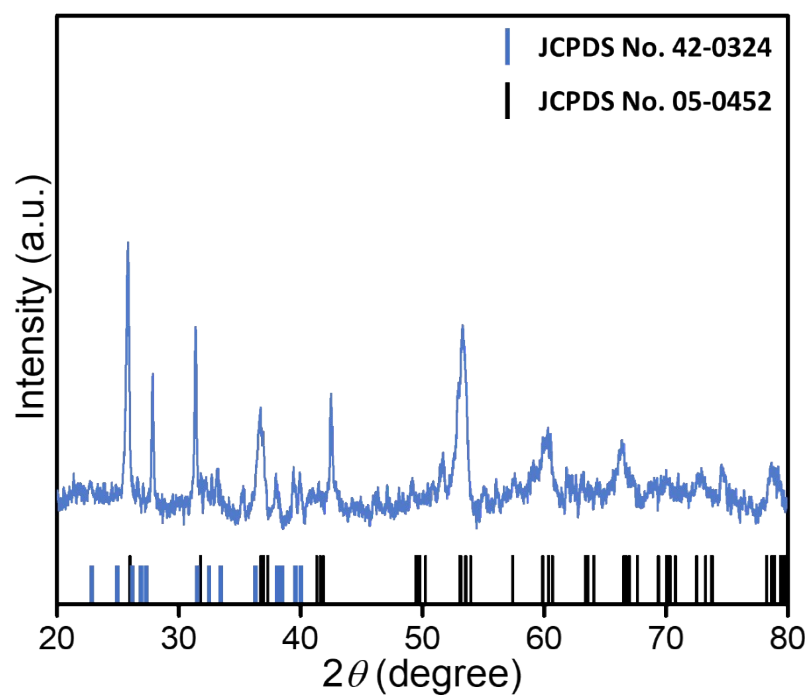

Figure S2. XRD of 320mg Fe foam in MoO<sub>2</sub> showing the presence of FeMoO<sub>4</sub> and MoO<sub>2</sub>.

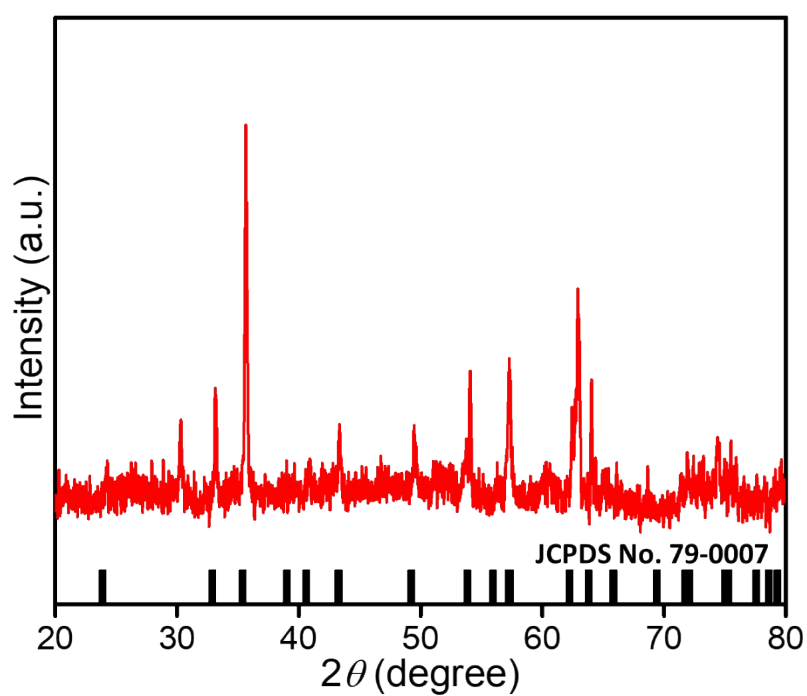

Figure S3. XRD of Fe<sub>2</sub>O<sub>3</sub> matching with JCPDS No. 79-0007.

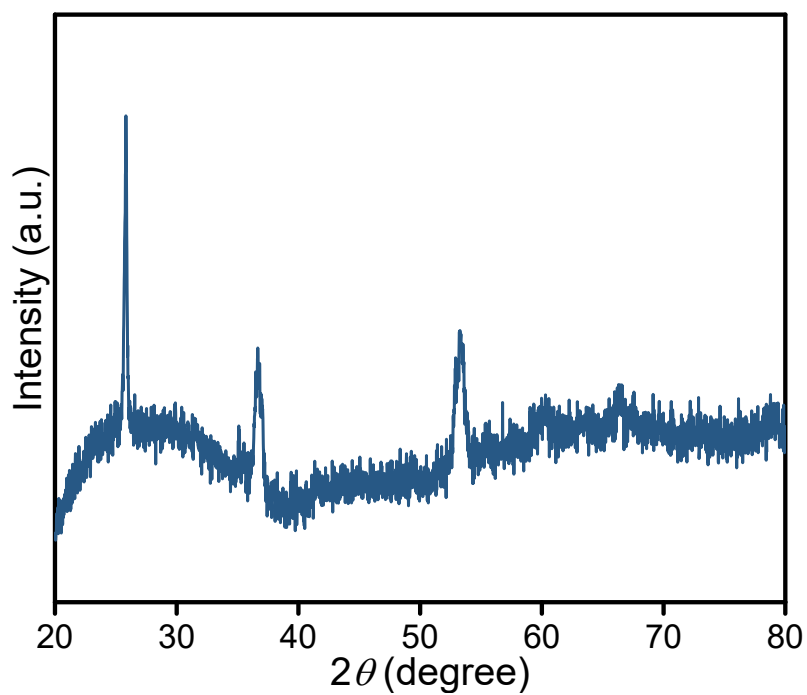

Figure S4. XRD of MO@FO before annealing showing a few peaks.

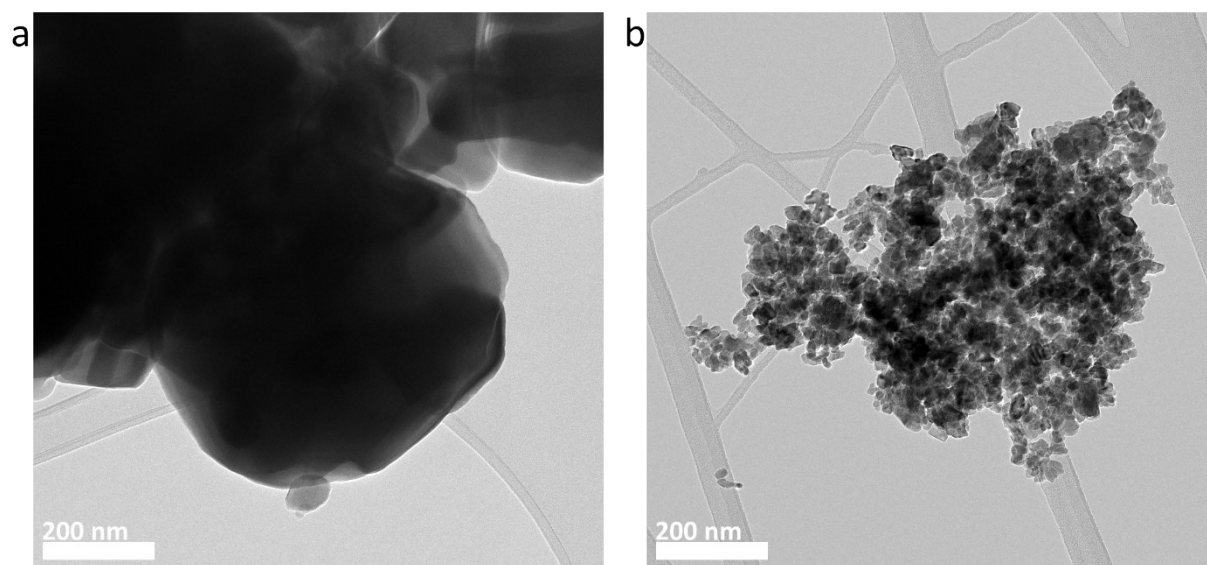

Figure S5. TEM image of (a) Fe<sub>2</sub>O<sub>3</sub> showing sheet-like and (b) MoO<sub>2</sub> showing flake-like structure.

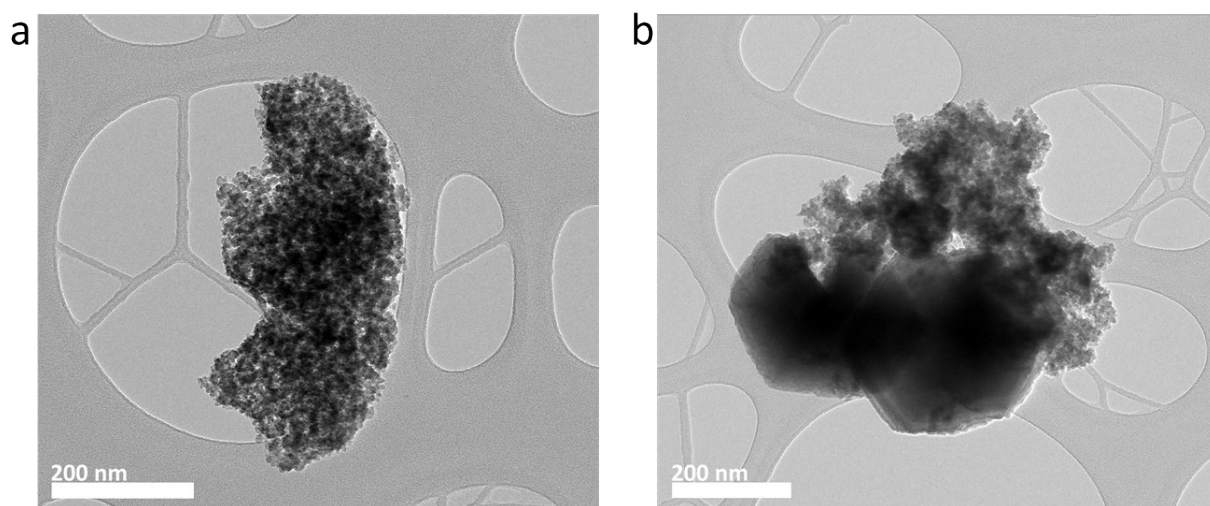

Figure S6. TEM images of the sample when Fe powder was used instead of Fe foam.

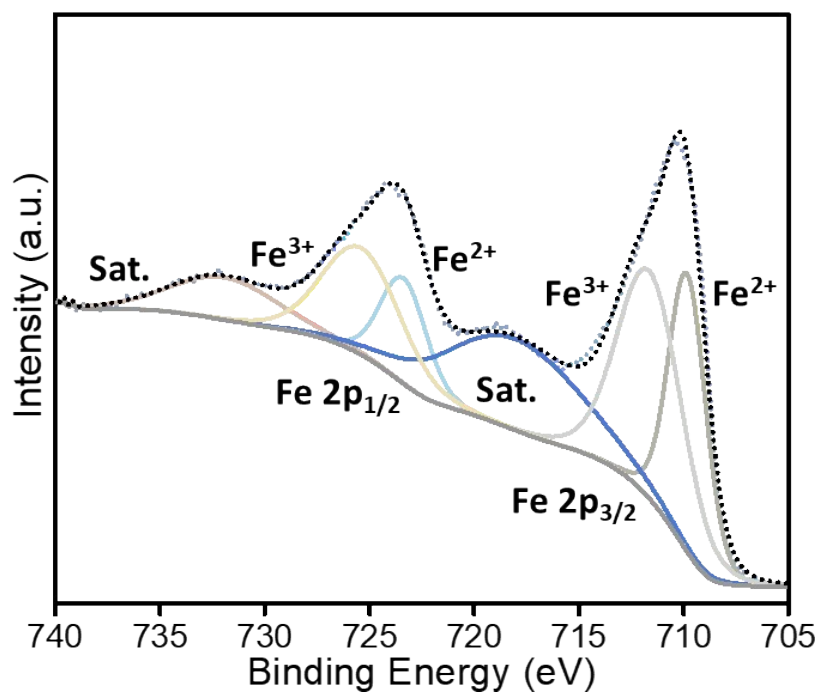

Figure S7. Fe 2p XPS spectrum of Fe<sub>2</sub>O<sub>3</sub> showing the presence of Fe<sup>2+</sup> and Fe<sup>3+</sup> oxidation states.

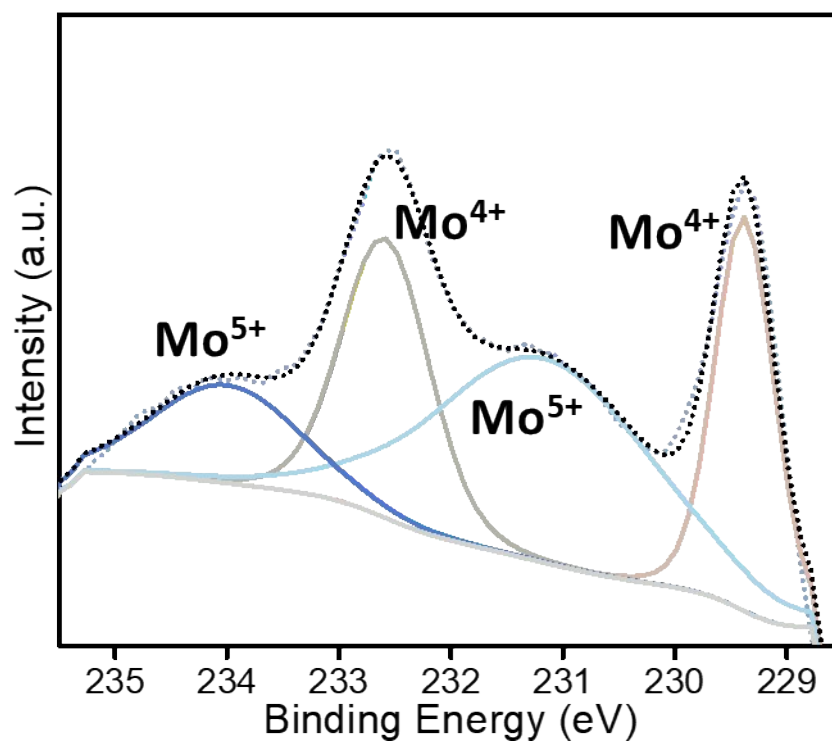

Figure S8. Mo 3d XPS spectrum of MoO<sub>2</sub> showing the presence of Mo<sup>4+</sup>, Mo<sup>5+</sup>, and Mo<sup>6+</sup> oxidation states.

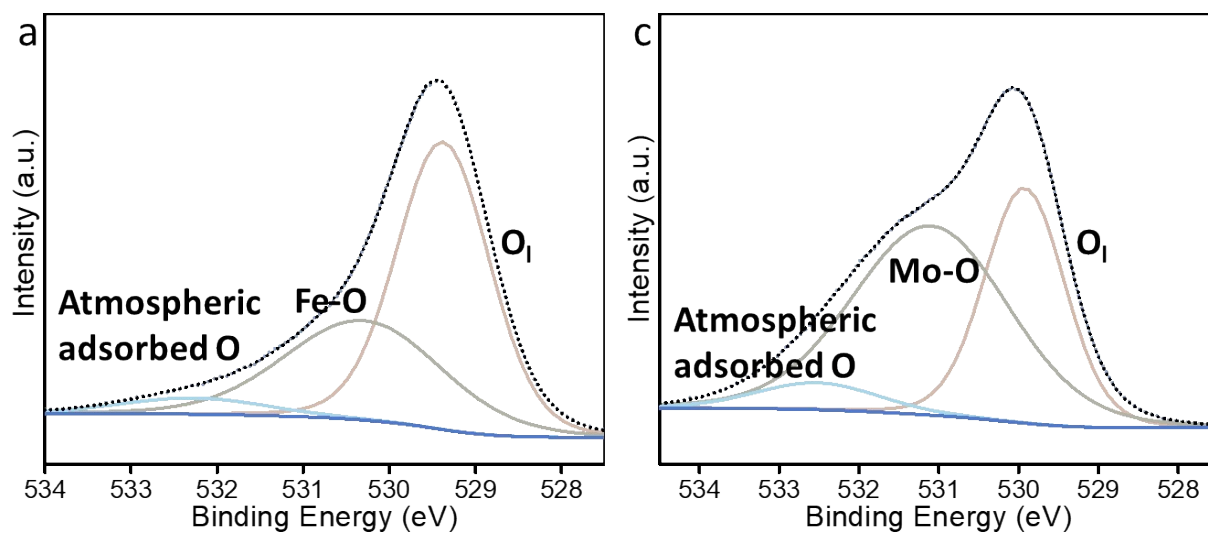

Figure S9. O 1s XPS spectrum of (a)  $\text{Fe}_2\text{O}_3$  and (b)  $\text{MoO}_2$  showing the presence of M-O bond.

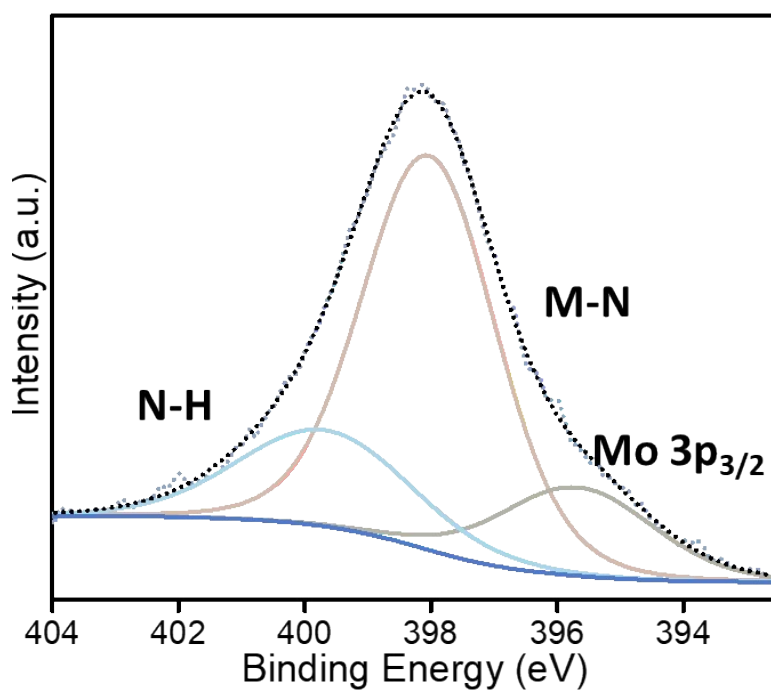

Figure S10. Deconvoluted N 1s spectra for  $\text{MO@FO}$ .

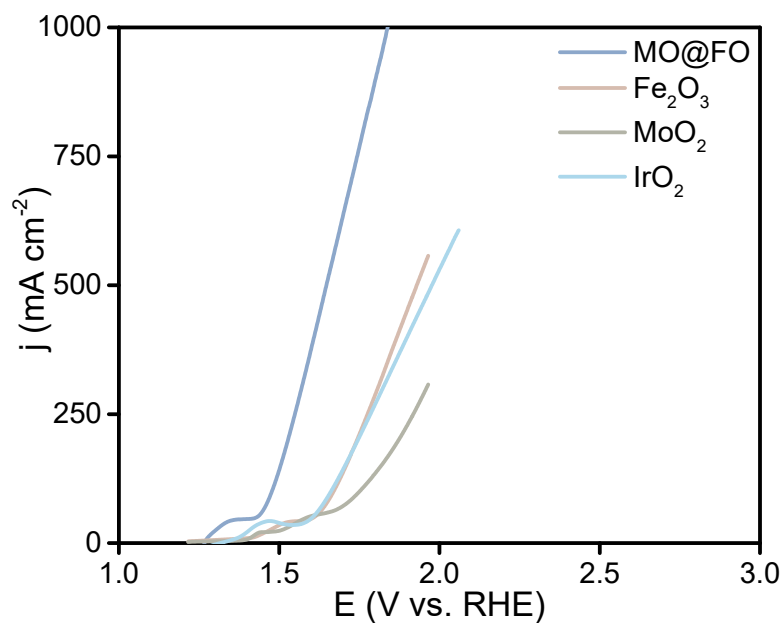

Figure S11. OER LSV curves for different samples in 1 M KOH.

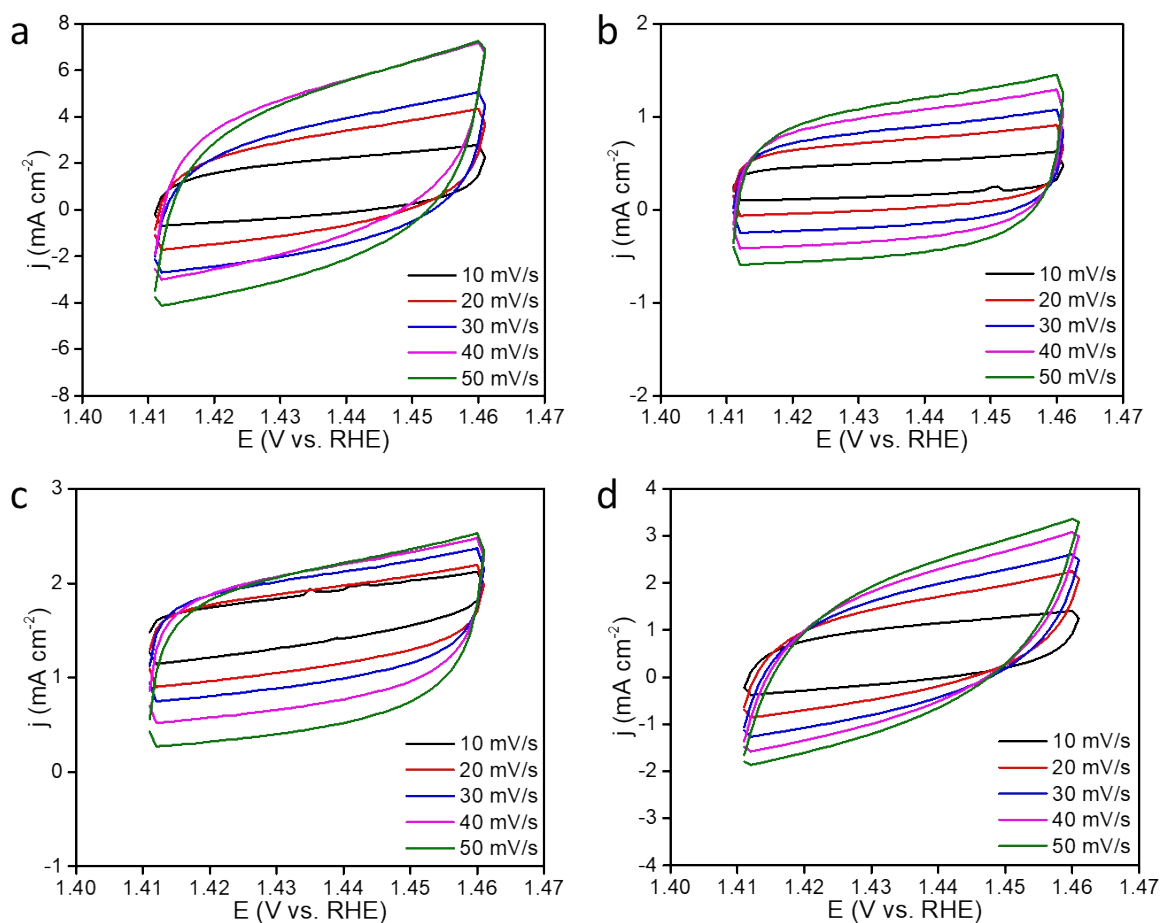

Figure S12. Cyclic voltammetry (CV) curves in the voltage range of 1.411 – 1.461 V vs. RHE, with scan rates ranging from 10 to 50 mV s<sup>-1</sup> (a) MO@FO, (b) Fe<sub>2</sub>O<sub>3</sub>, (c) MoO<sub>2</sub>, and (d) IrO<sub>2</sub> indicating that the heterostructure has the highest electrochemical active surface area.

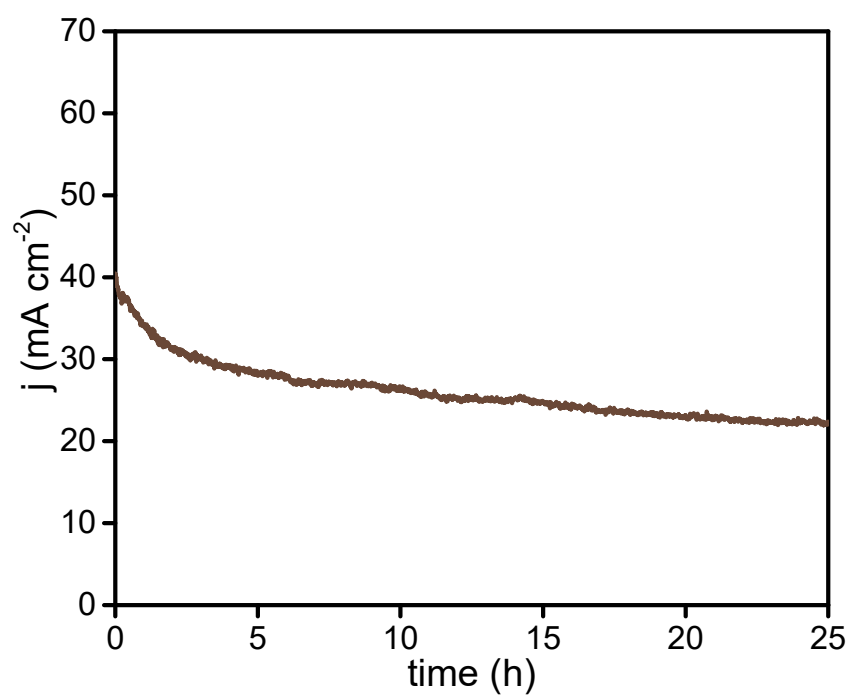

Figure S13. Long-term stability for IrO<sub>2</sub> in alkaline seawater.

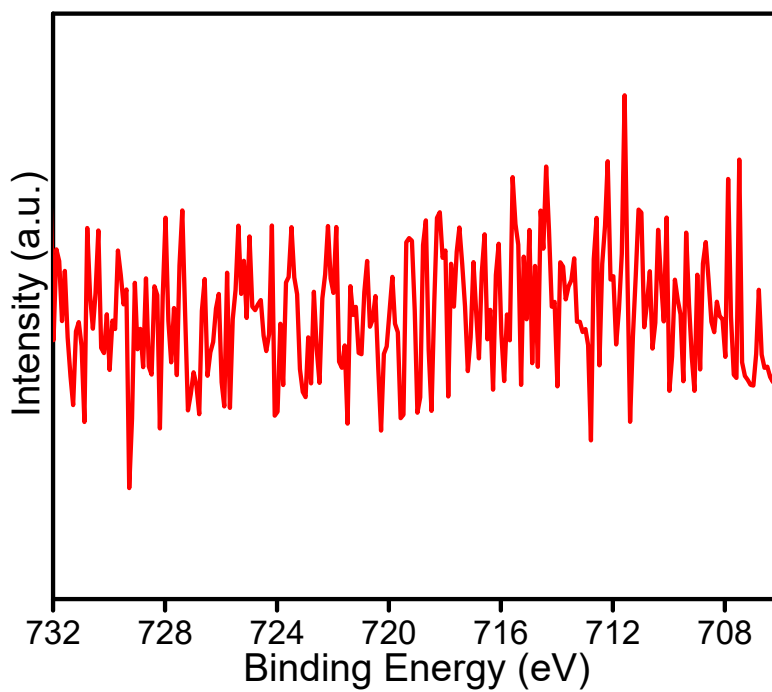

Figure S14. Post-stability (250 h) Fe 2p XPS spectrum for MO@FO in seawater showing leaching of Fe.

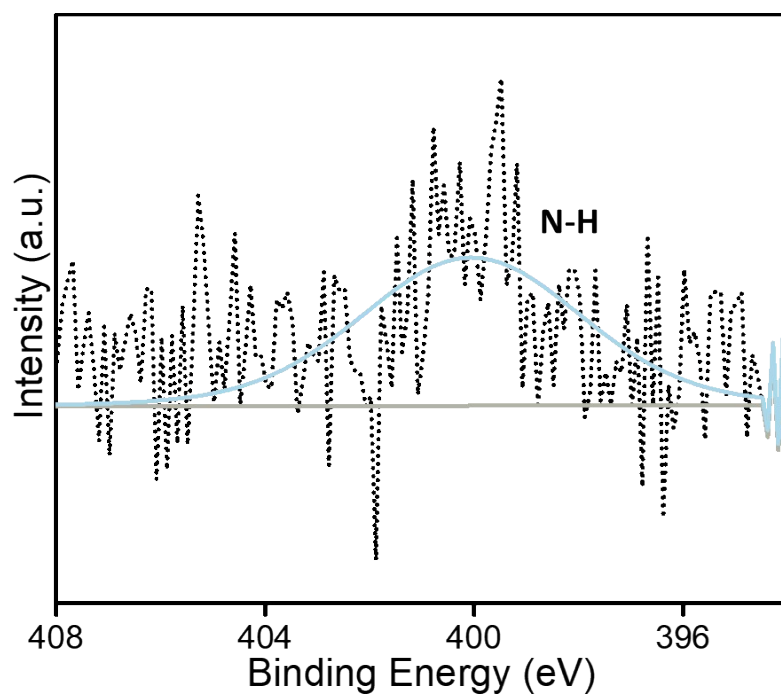

Figure S15. N 1s XPS spectrum for MO@FO after testing in 1M SW without Iron nitrate salt.

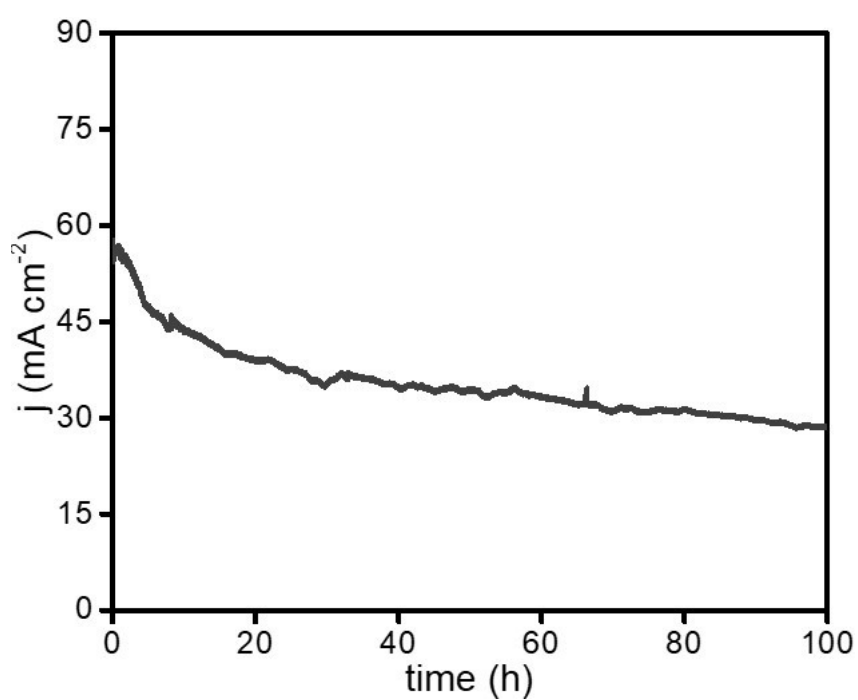

Figure S16. Stability testing for MO@FO in alkaline seawater with 0.0375 mM Iron nitrate salt.

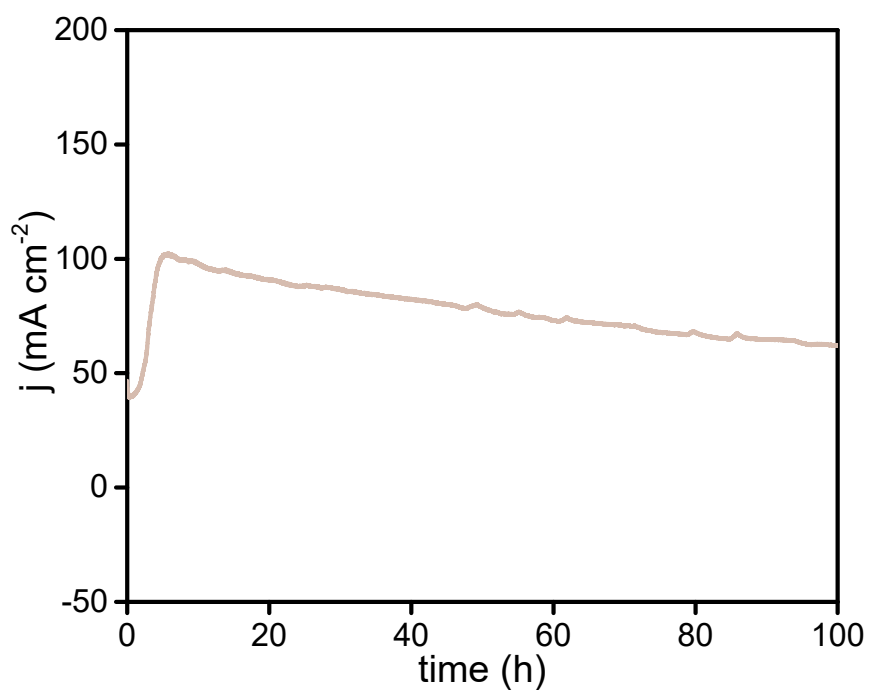

Figure S17. Stability testing for MO@FO in alkaline seawater with 0.0625 mM Iron nitrate salt.

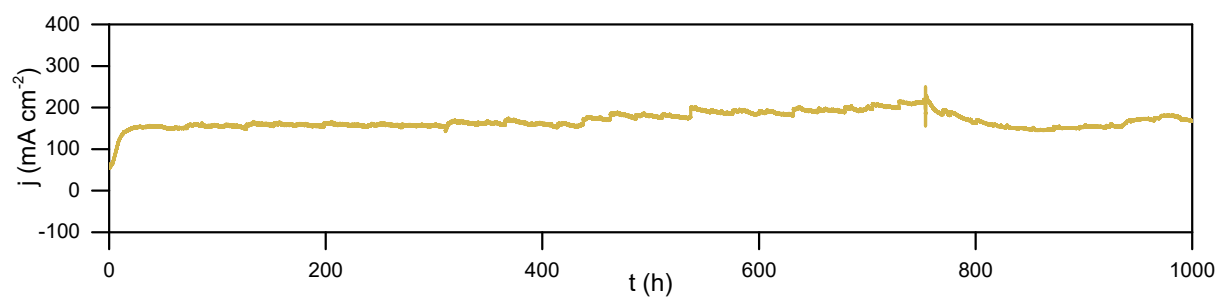

Figure S18. MO@FO 1000 h stability testing after adding iron sulphate salt in alkaline seawater.

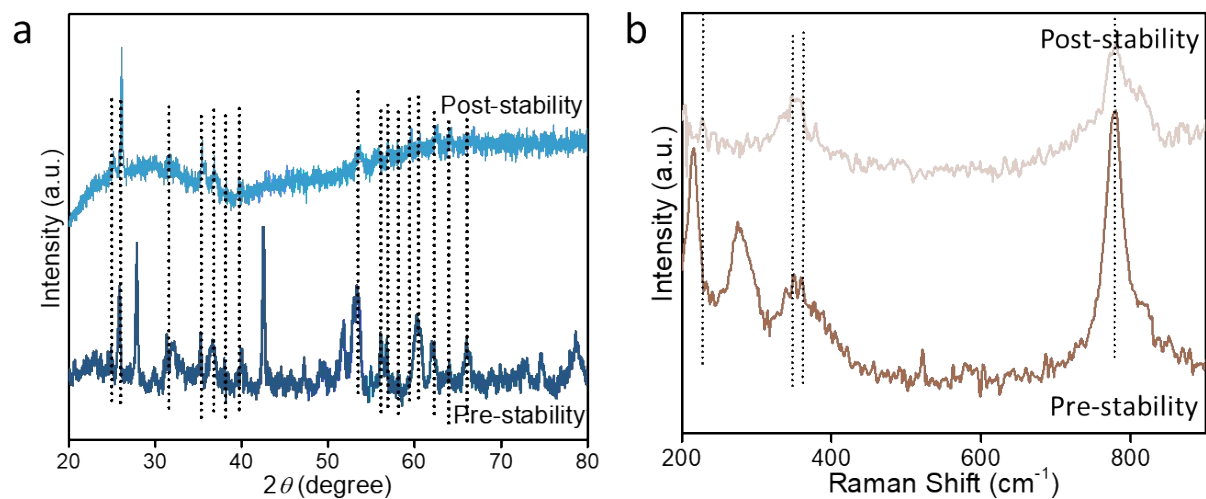

Figure S19. Post-stability (a) XRD and (b) Raman spectra of MO@FO.

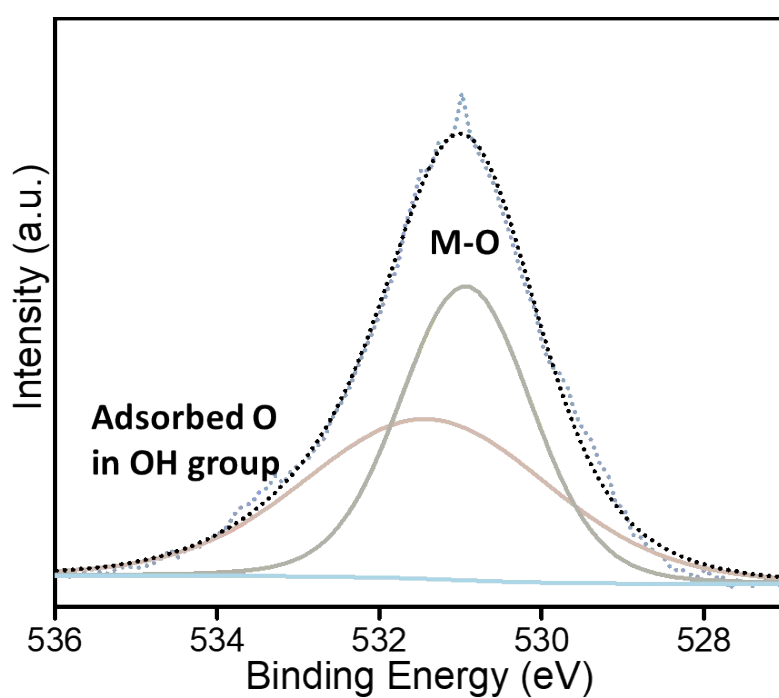

Figure S20. O 1s XPS spectrum for MO@FO after testing in 1M SW with 0.05 mM Iron nitrate salt.

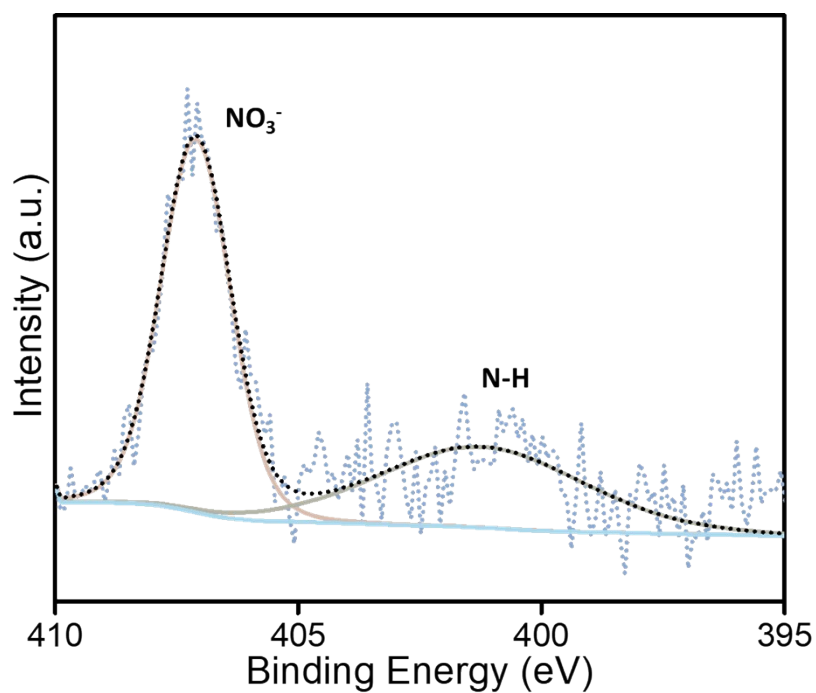

Figure S21. N 1s XPS spectrum for MO@FO after testing in 1M SW with 0.05 mM Iron nitrate salt.

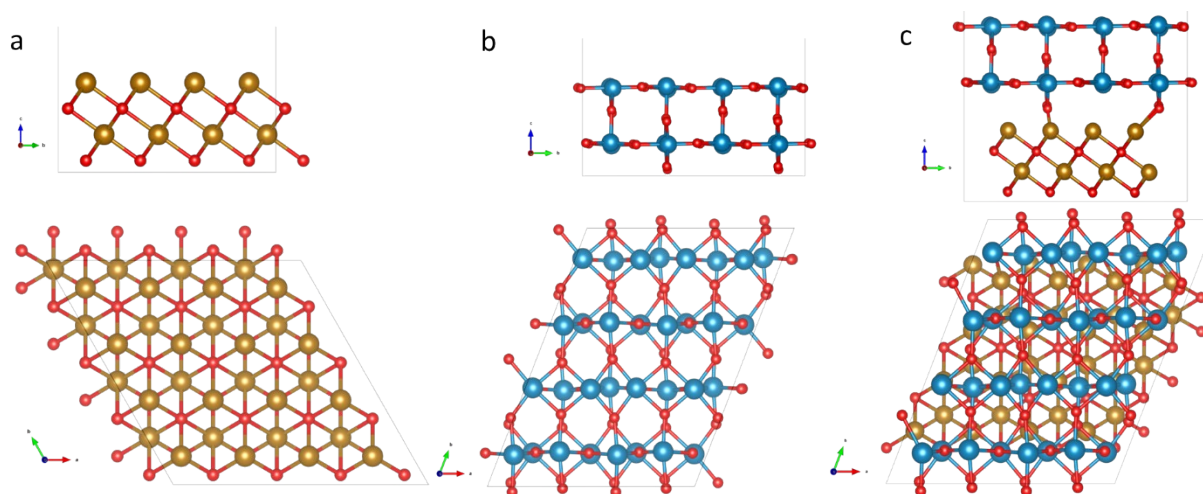

Figure S22. Side and top views of model (a) FeO(111) (b) MoO<sub>2</sub>(-111) surfaces and (c) MoO<sub>2</sub>@FeO heterostructure.

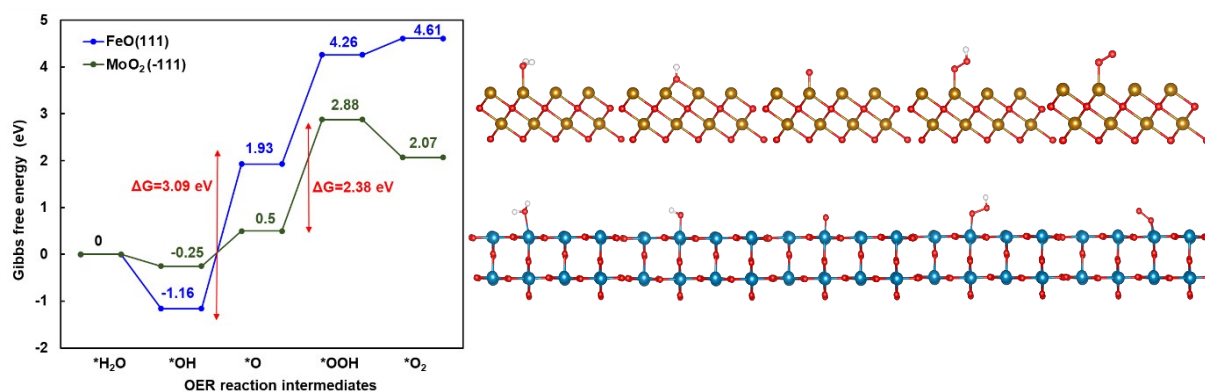

Figure S23: Free energy diagram of OER in alkaline condition on FeO(111) and MoO<sub>2</sub>(-111) represented in blue and green lines respectively, with corresponding optimized geometries of OER intermediates of FeO (top) and MoO<sub>2</sub> (bottom).

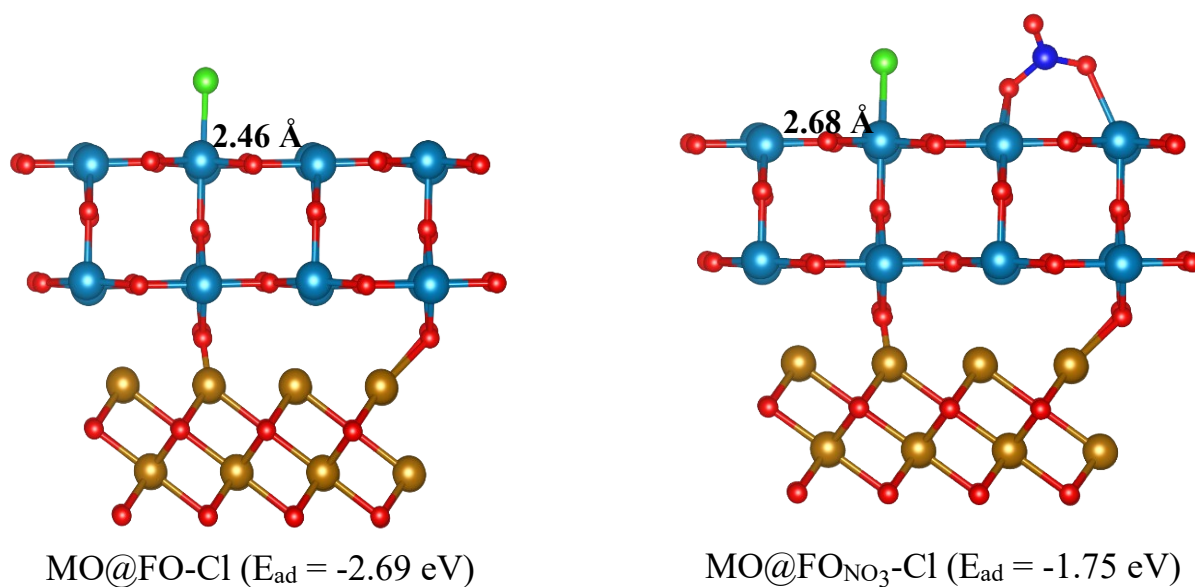

Figure S24: MO@FO heterostructure showing \*Cl adsorption in the absence and presence of NO<sub>3</sub><sup>-</sup> anion, the Mo-Cl bond represented in the figure.

**Table S1.** Overpotential comparison of MO@FO with the other catalysts reported in the literature in seawater/simulated seawater.

| Sample | Catalyst                                         | Overpotential (mV @mA cm <sup>-2</sup> ) | Electrolyte                                      | Reference |
|--------|--------------------------------------------------|------------------------------------------|--------------------------------------------------|-----------|
| 1      | MO@FO                                            | 290 mV @100 mA cm <sup>-2</sup>          | 1 M KOH in seawater                              | This Work |
| 2      | PW-OA-RuO <sub>x</sub> @C                        | 158 mV @10 mA cm <sup>-2</sup>           | 0.5 M H <sub>2</sub> SO <sub>4</sub> in seawater | [1]       |
| 3      | Ti@TiN/Ni-Fe-LDH                                 | 250 mV @100 mA cm <sup>-2</sup>          | Simulated seawater (1 M KOH + 0.5 M NaCl)        | [2]       |
| 4      | 15%-WO <sub>3</sub> ·xH <sub>2</sub> O-in-MIL-88 | 360 mV @ 10 mA cm <sup>-2</sup>          | Alkaline seawater                                | [3]       |
| 5      | N-NiMo <sub>3</sub> P                            | 346 mV @10 mA cm <sup>-2</sup>           | 1 M KOH in seawater                              | [4]       |
| 6      | Co-CoO@C                                         | 374 mV @10 mA cm <sup>-2</sup>           | 1 M KOH in seawater                              | [5]       |
| 7      | Pd-doped CoNPs@C                                 | 429 mV @100 mA cm <sup>-2</sup>          | Simulated seawater (1 M KOH + 0.6 M NaCl)        | [6]       |
| 8      | Ni <sub>x</sub> Cr <sub>y</sub> O                | 370 mV @100 mA cm <sup>-2</sup>          | 1 M KOH in seawater                              | [7]       |
| 9      | Co <sub>3-x</sub> Pd <sub>x</sub> O <sub>4</sub> | 370 mV @10 mA cm <sup>-2</sup>           | pH-neutral simulated seawater                    | [8]       |
| 10     | 60Fe/NF                                          | 254 mV @10 mA cm <sup>-2</sup>           | 1 M KOH in seawater                              | [9]       |
| 11     | RuO <sub>2</sub> /NiFeOOH                        | 273.5 mV @100 mA cm <sup>-2</sup>        | 1 M KOH in seawater                              | [10]      |

**Table S2.** EIS data fitting parameters

| Sample                         | R1    | R2    | CPE1  |
|--------------------------------|-------|-------|-------|
| MO@FO                          | 0.25  | 2.025 | 0.975 |
| Fe <sub>2</sub> O <sub>3</sub> | 2.23  | 1.648 | 0.814 |
| MoO <sub>2</sub>               | 1.741 | 2.128 | 0.781 |

**Table S3.** ICP-MS results showing Mo and Fe content in seawater electrolytes before and after stability testing.

| Sample                                                                 | Mo (ppb) | Fe (ppb)                           |
|------------------------------------------------------------------------|----------|------------------------------------|
| ICP-MS Standard solution                                               | 0.041    | 0.466                              |
| 1 M KOH in seawater                                                    | 0.078    | 0.466                              |
| 1 M KOH in seawater after stability testing                            | 42.876   | 209.46                             |
| 1 M KOH in seawater + iron nitrate salt before stability testing       | 0.066    | 165.427                            |
| 1 M KOH in seawater + iron nitrate salt after 1000 h stability testing | 5.097    | 175.067 (only 9.64 ppb difference) |

**Table S4.** Sample parameters obtained from the polarization curves in 5% NaCl in DI water.

| Sample                         | E <sub>corr</sub> (V) | I <sub>corr</sub> (μA cm <sup>-2</sup> ) | corrosion rate (μm/year) |
|--------------------------------|-----------------------|------------------------------------------|--------------------------|
| MO@FO                          | -0.759                | 0.009                                    | 0.036                    |
| Fe <sub>2</sub> O <sub>3</sub> | -0.778                | 0.012                                    | 0.048                    |
| MoO <sub>2</sub>               | -0.779                | 0.014                                    | 0.056                    |

$$\text{Corrosion rate} = \frac{I_{\text{corr}}}{\text{area}}$$

Where area = area of the working electrode

**Table S5:** Calculated water adsorption energy and closest metal-oxygen bond lengths on the oxide surfaces and MO@FO heterostructure.

| Surface                 | M-O Distance (Å) | Adsorption energy (eV) | OER limiting potentials (V) |
|-------------------------|------------------|------------------------|-----------------------------|
| FeO(111)                | 2.14             | -0.86                  | -1.90                       |
| MoO <sub>2</sub> (-111) | 2.31             | -1.06                  | -3.90                       |
| MO@FO                   | 2.29             | -1.16                  | -2.37                       |

References

- [1] J. Ding, Z. Peng, Z. Wang, C. Zeng, Y. Feng, M. Yang, G. Hu, J. Luo, X. Liu, *J. Mater. Chem. A* **2024**, *12*, 28023-28031.
- [2] W. Yoon, Y. H. Park, X. Jin, S.-J. Hwang, *J. Mater. Chem. A* **2024**, *12*, 21016-21024.
- [3] Z. Huang, W. Shao, Y. Zheng, J. Wang, M. Wang, S. Li, X. Xu, C. Cheng, C. Zhao, *J. Mater. Chem. A* **2024**, *12*, 19968-19978.
- [4] S. Loomba, M. W. Khan, M. Haris, S. M. Mousavi, A. Zavabeti, K. Xu, A. Tadich, L. Thomsen, C. F. McConville, Y. Li, S. Walia, N. Mahmood, *Small* **2023**, *19*, 2207310.
- [5] S. Fathima T.K, A. Ghosh, S. Ramaprabhu, *Int. J. Hydrogen Energy* **2024**, *49*, 780-793.
- [6] Z. K. Ghouri, D. J. Hughes, K. Ahmed, K. Elsaid, M. M. Nasef, A. Badreldin, A. Abdel-Wahab, *Sci. Rep.* **2023**, *13*, 20866.
- [7] A. Malek, Y. Xue, X. Lu, *Angew. Chem.* **2023**, *135*, e202309854.
- [8] N. Wang, P. Ou, S. F. Hung, J. E. Huang, A. Ozden, J. Abed, I. Grigioni, C. Chen, R. K. Miao, Y. Yan, *Adv. Mater.* **2023**, *35*, 2210057.
- [9] Y. Zhuo, D. Liu, L. Qiao, S. Chen, J. Lu, W. F. Ip, H. Pan, Z. Wang, *Adv. Energy Mater.* **2023**, *13*, 2301921.
- [10] G. Chang, Y. Zhou, J. Wang, H. Zhang, P. Yan, H. B. Wu, X. Y. Yu, *Small* **2023**, *19*, 2206768.
- [11] G. Kresse, J. Furthmüller, *Comput. Mater. Sci.*, **1996**, *6*, 15-50.
- [12] G. Kresse, J. Furthmüller, *Phys. Rev. B.*, **1996**, *54*, 11169-11186.
- [13] J.P. Perdew, K. Burke, M. Ernzerhof, *Phys. Rev. Lett.*, **1996**, *77*, 3865-3868.
- [14] S. Grimme, S. Ehrlich, L. Goerigk, *J. Comput. Chem.*, **2011**, *32*, 1456.
